# Supplementary material for: Fabrication and Characterization of Free-Standing and Flexible Polyaniline Membranes: Role of Graphene Nanoscrolls
Source: MDPI journal article supplement (doi:10.3390/macromol2040035), 2022-11-21
Supplement: s1 [file s1]

Archive with 1 entries (1 files):
- macromol-1845492-supplementary.pdf
